# Supplementary material
Source: publisher figshare collection journal article supplement (https://gsapubs.figshare.com/ndownloader/files/23298674)
Supplement: Supplementary file 1 [file 23298674]

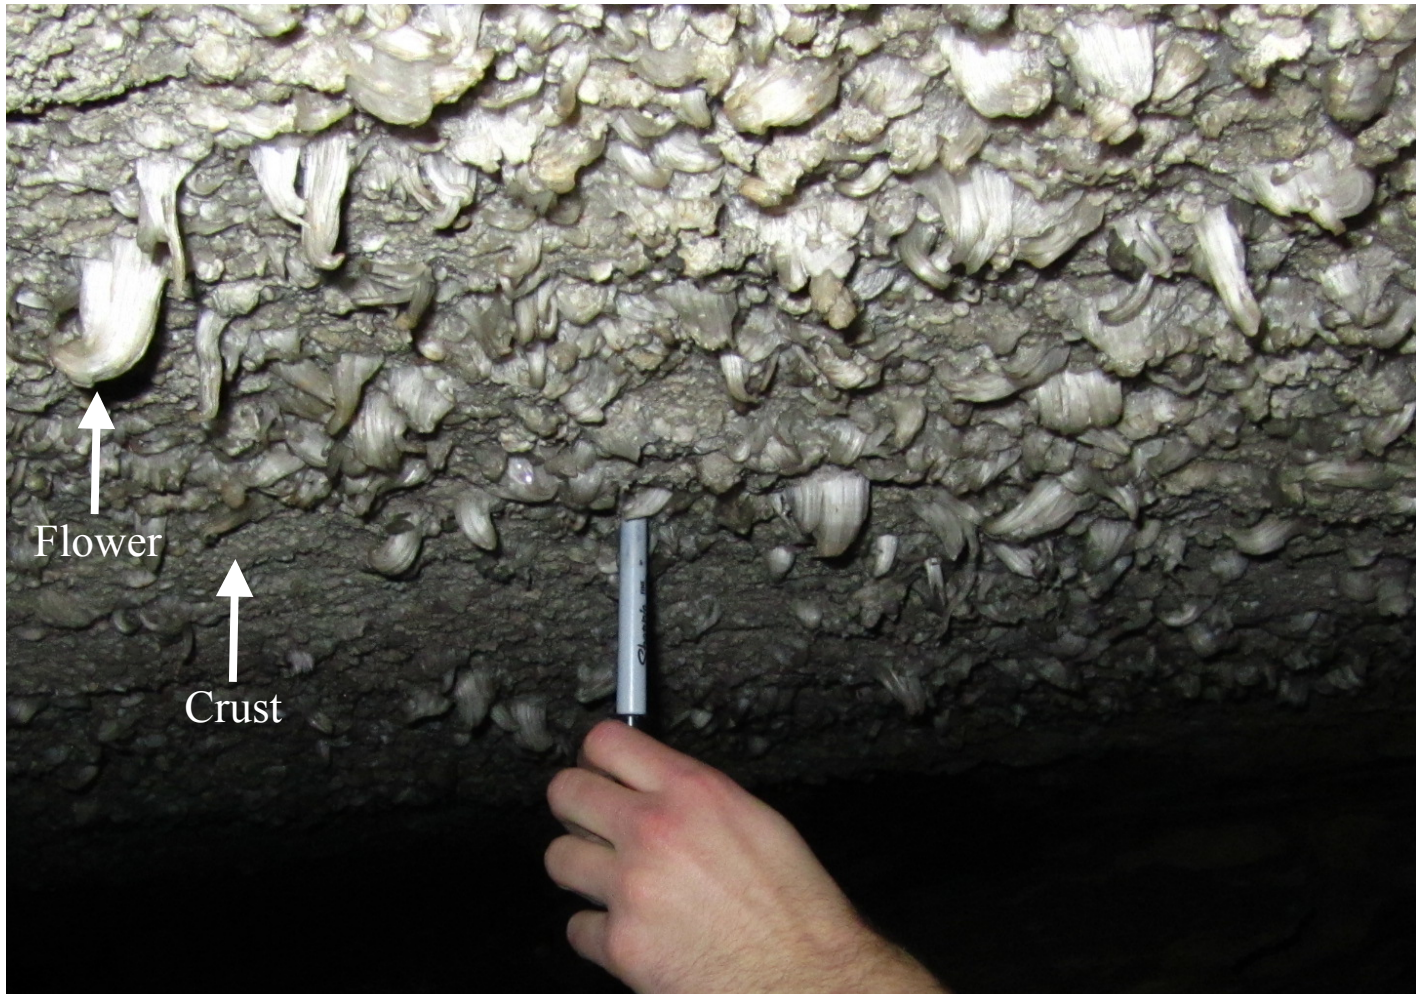

Figure S1.

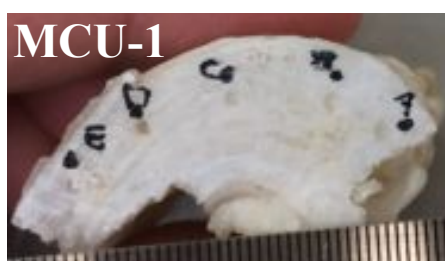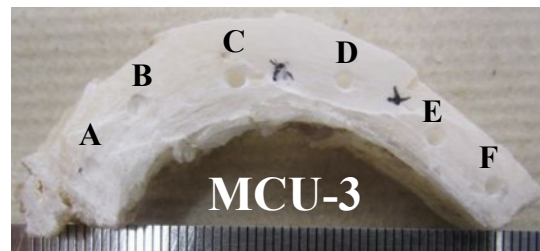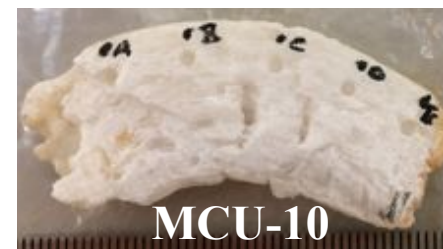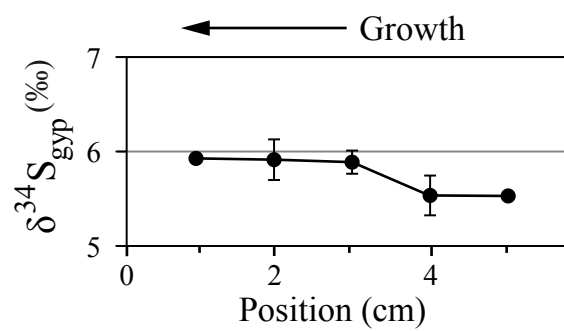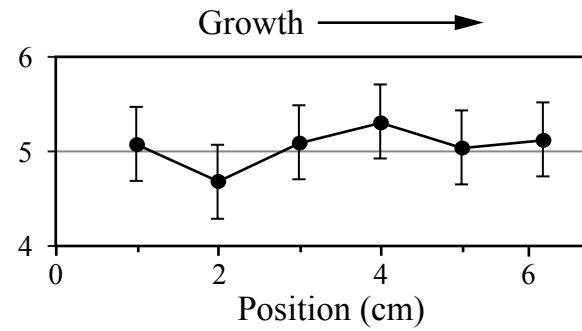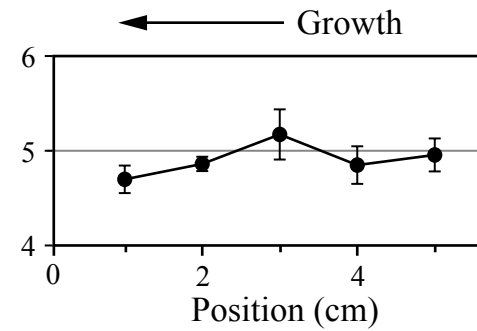

Figure S2.

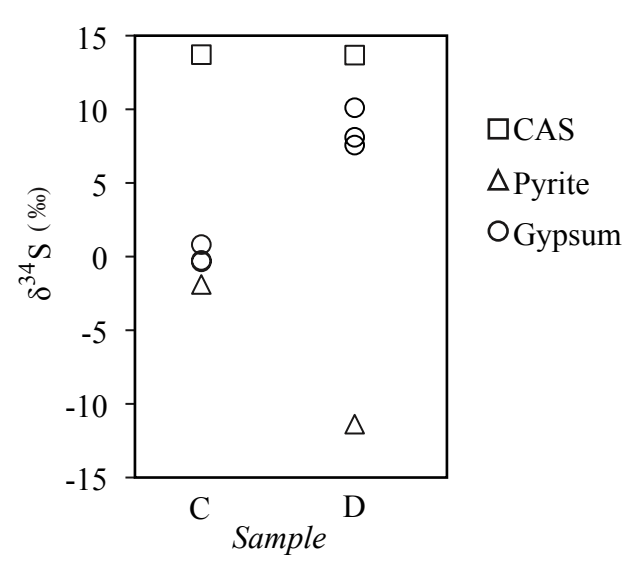

Figure S3

Table S1. Geochemical and stratigraphic information for gypsum sample locations

| Location | Ridge   | Formation      | Member        | Sub-unit | n  | $\delta^{34}\text{S}_{\text{gyp}}$ | $\sigma$ |
|----------|---------|----------------|---------------|----------|----|------------------------------------|----------|
| 1        | Mammoth | Ste. Genevieve | Joppa         | J1       | 8  | 5.6                                | 0.5      |
| 2        | Mammoth | Ste. Genevieve | Joppa         | J1       | 9  | 6.8                                | 0.7      |
| 3        | Mammoth | Ste. Genevieve | Joppa         | J1       | 10 | 10.0                               | 1.1      |
| 4        | Mammoth | Ste. Genevieve | Joppa         | J1       | 10 | 8.1                                | 0.7      |
| 5        | Mammoth | Ste. Genevieve | Joppa         | J2       | 9  | 1.5                                | 3.6      |
| 6        | Mammoth | Ste. Genevieve | Joppa         | J2       | 9  | -2.0                               | 3.1      |
| 7        | Mammoth | Ste. Genevieve | Joppa         | J1       | 10 | 4.1                                | 1.6      |
| 8        | Mammoth | Ste. Genevieve | Joppa         | J1       | 10 | 6.5                                | 1.7      |
| 9        | Mammoth | Ste. Genevieve | Joppa         | J1       | 10 | 6.0                                | 1.5      |
| 10       | Mammoth | Ste. Genevieve | Karnak        | N/A      | 3  | -1.8                               | 1.5      |
| 11       | Flint   | Girkin         | Levias/Paoli* | L2 & P1  | 6  | -10.8                              | 1.1      |
| 12       | Flint   | Girkin         | Paoli         | P2       | 9  | -5.6                               | 0.7      |

\*Levias on wall, Paoli on ceiling, samples taken from floor and could have fallen from either. n = number of samples at location,  $\delta^{34}\text{S}_{\text{gyp}}$  is average of all samples at location,  $\sigma$  = standard deviation for all samples at location



Table S2. Geochemical and geologic information for whole rock samples

| Sample ID | Location   | Formation        | Member | Sub-unit | Lithology           | CAS (ppm) | Pyrite (ppm) | $\delta^{34}\text{S}_{\text{CAS}}$ | $\delta^{34}\text{S}_{\text{pyr}}$ | $\delta^{34}\text{S}_{\text{gyp}}$ |
|-----------|------------|------------------|--------|----------|---------------------|-----------|--------------|------------------------------------|------------------------------------|------------------------------------|
| 1         | Surface    | Girkin           | ND     |          | Limestone           | 839       | <10          | 15.20                              |                                    |                                    |
| 2         | Surface    | Girkin           | ND     |          | Limestone           | 136       | 98           | 17.25                              |                                    |                                    |
| 3         | Surface    | Big Clifty       | ND     |          | Sandstone           | NP        | <10          |                                    | 4.39                               |                                    |
| 4         | Surface    | Hardinsburg      | ND     |          | Sandstone           | NP        | <10          |                                    | 17.38                              |                                    |
| 5         | Surface    | Caseyville       | ND     |          | Conglomerate        | NP        | <10          |                                    | 9.14                               |                                    |
| 6         | Surface    | Unknown (Haney?) | ND     |          | Limestone           | 132       | 12           | 14.58                              |                                    |                                    |
| 7         | Surface    | Fraileys         | ND     |          | Shale               | NP        | <10          |                                    |                                    |                                    |
| 8         | Surface    | Big Clifty       | ND     |          | Sandstone           | NP        | <10          |                                    |                                    |                                    |
| 9         | Surface    | Big Clifty       | ND     |          | Sandstone           | NP        | <10          |                                    |                                    |                                    |
| 10        | Surface    | Girkin           | ND     |          | Limestone           | 523       | 239          | 16.92                              | -40.71                             |                                    |
| 11        | Surface    | Unknown          | ND     |          | Limestone (Oolitic) | 360       | <10          | 17.01                              | -15.23                             |                                    |
| 12        | Surface    | Ste. Genevieve   | ND     |          | Limestone           | 58        | 186          | 16.72                              | 14.44                              |                                    |
| 13        | Surface    | Girkin           | ND     |          | Limestone           | 218       | <10          | 16.79                              | -15.40                             |                                    |
| 14        | Surface    | Big Clifty       | ND     |          | Sandstone           | NP        | <10          |                                    | 15.18                              |                                    |
| 15        | Surface    | Ste. Genevieve   | ND     |          | Limestone           | 723       | <10          | 15.48                              | 1.17                               |                                    |
| 16        | Surface    | Fraileys         | ND     |          | Shale               | NP        | <10          |                                    | -2.20                              |                                    |
| A         | Subsurface | Ste. Genevieve   | Joppa  | J1       | Limestone           | 422       | <10          | 13.30                              | -11.38                             |                                    |
| B         | Subsurface | Ste. Genevieve   | Joppa  | J1       | Limestone           | 457       | <10          | 12.61                              | -10.43                             |                                    |
| C         | Subsurface | Ste. Genevieve   | Joppa  | J1       | Limestone           | 426       | 21           | 13.72                              | -7.02                              | 0.07                               |
| D         | Subsurface | Ste. Genevieve   | Joppa  | J1       | Limestone           | 1218      | <10          | 13.32                              | -1.89                              | 8.59                               |

$\delta^{34}\text{S}_{\text{gyp}}$  refers to gypsum crusts. NP = no precipitate. Only siliciclastic samples failed to yield a precipitate. Pyrite samples with <10 ppm yielded a precipitate, but mass of precipitate was below gravimetric detection limits. Stratigraphic formation could not be confidently identified for samples 6 and 11; these were therefore not included in interpretations.

Table S3. Geochemical and stratigraphic information for water samples.

| Sample ID | Location    | Formation      | Filtered? | ZnAcetate? | [SO <sub>4</sub> <sup>2-</sup> ] ppm | δ <sup>34</sup> S <sub>SO4</sub> |
|-----------|-------------|----------------|-----------|------------|--------------------------------------|----------------------------------|
| W1        | Pool        | Ste. Genevieve | Y         | N          | 282                                  | -7.71                            |
| W2        | Sulfur seep | Ste. Genevieve | Y         | N          | 535                                  | -4.50                            |
| W2        | Sulfur seep | Ste. Genevieve | Y         | Y          | ND                                   | -4.18                            |
| W2        | Sulfur seep | Ste. Genevieve | N         | Y          | ND                                   | -4.34                            |

Pool is located below ~8m drop. Filter mesh size was 0.2μm. ND = Not determined.
